# Supplementary material for: “When ‘Bad’ is ‘Good’”: Identifying Personal Communication and Sentiment in Drug-Related Tweets
Source: PubMed Central journal article supplement (PMC5099500; doi:10.2196/publichealth.6327), 2016-10-24
Supplement: publichealth_v2i2e162_app1.pdf [file publichealth_v2i2e162_app1.pdf]

| Category                            | Description                                                                                                                                              | Tweet examples                                                                                                                                                                      |
|-------------------------------------|----------------------------------------------------------------------------------------------------------------------------------------------------------|-------------------------------------------------------------------------------------------------------------------------------------------------------------------------------------|
| Personal communication              | Tweets posted by individual users; express personal experiences, opinions and thoughts                                                                   | <p>"At work, munching on edibles"</p> <p>"Going to rip a few dabs"</p>                                                                                                              |
| Media/official communication tweets | News reports, scientific study results, and other information shared by official sources, including government agencies, non-profits, and media sources. | <p>"Marijuana Legalization In Ohio 2015: Voters Could Decide To Legalize Weed In November As Measure Moves Forward <a href="http://t.co/cguOscOxZ7">http://t.co/cguOscOxZ7</a>"</p> |
| Retail-related tweets               | Information shared by retail organizations about product and service promotion                                                                           | <p>"It's CBD Sunday! 10% off all CBD flower, tincture, edibles and concentrates!"</p>                                                                                               |
