# Supplementary material for: “When ‘Bad’ is ‘Good’”: Identifying Personal Communication and Sentiment in Drug-Related Tweets
Source: PubMed Central journal article supplement (PMC5099500; doi:10.2196/publichealth.6327), 2016-10-24
Supplement: publichealth_v2i2e162_app2.pdf [file publichealth_v2i2e162_app2.pdf]

| Category                       | Description/Thematic Groups                                                                                                                                           | Tweets Examples                                                                                                                                                                                                            |
|--------------------------------|-----------------------------------------------------------------------------------------------------------------------------------------------------------------------|----------------------------------------------------------------------------------------------------------------------------------------------------------------------------------------------------------------------------|
| <b>Positive</b>                | • Expression of liking, approval (like, love, support)                                                                                                                | "I love dabs"                                                                                                                                                                                                              |
|                                | • Positive qualities of drugs or people who use them                                                                                                                  | "Yea, I remember...edibles are a lot better"                                                                                                                                                                               |
|                                | • Indication of drug usage, intentions to use, buy, or share drugs; encourage others to us                                                                            | "I need some ganja"<br>"Just found 50 bucks, going to buy dabs, you wanna join? Hmu"<br>"Vendor Day! Free candy and information on infused edibles. #edibles <a href="http://t.co/GV8XeLLf9">http://t.co/GV8XeLLf9</a> "   |
|                                | • Positive/desirable effects                                                                                                                                          | "Tried my first dab Tuesday night. Best sleep I've had in a while"<br>"Study: #Cannabis Users Have Lower Incidence of Bladder Cancer. <a href="http://t.co/XkpQiR2dfW">http://t.co/XkpQiR2dfW</a> "                        |
| <b>Negative</b>                | • Expression of disliking, disapproval (don't like, hate)                                                                                                             | "I hate edibles"                                                                                                                                                                                                           |
|                                | • Negative characteristics of drugs and/or people who use them                                                                                                        | "Girls who smoke spice are gross asf"                                                                                                                                                                                      |
|                                | • Indicate non-usage, plans to quit using, or discourage others from using                                                                                            | "I didn't smoke no spliff on 420"<br>"Don't ever smoke synthetic pot u guys"                                                                                                                                               |
|                                | • Negative/undesirable effects                                                                                                                                        | "Dabs are too much, I'm fucking dying"<br>"My girl said that the spliff takes the soul from me"<br>"Surge in synthetic pot use linked to rise in violent crime <a href="http://t.co/hjD4yyIxE">http://t.co/hjD4yyIxE</a> " |
| <b>Neutral/ unidentifiable</b> | • Tweets that report factual information/no opinion                                                                                                                   | "New York Begins Accepting Medical Marijuana Applications <a href="http://t.co/gbs0t7m1F">http://t.co/gbs0t7m1F</a> "                                                                                                      |
|                                | • Tweets as questions                                                                                                                                                 | "What do dabs feel like?"                                                                                                                                                                                                  |
|                                | • Too ambiguous/unclear                                                                                                                                               | "[NAME] enjoy your porridge you'll be passed around like a spliff"                                                                                                                                                         |
|                                | • Not enough textual information (Tweets with a link to visual content that helps explain the meaning were coded as neutral because visual content was not analyzed). | "Me, when I'm high on edibles: http link"                                                                                                                                                                                  |
