# Supplementary material for: “When ‘Bad’ is ‘Good’”: Identifying Personal Communication and Sentiment in Drug-Related Tweets
Source: PubMed Central journal article supplement (PMC5099500; doi:10.2196/publichealth.6327), 2016-10-24
Supplement: publichealth_v2i2e162_app4.pdf [file publichealth_v2i2e162_app4.pdf]

| <b>A. Manually Labeled Tweets Used to Train Source Classification (N=1,000)</b>    |                        |                               |                        |
|------------------------------------------------------------------------------------|------------------------|-------------------------------|------------------------|
| Personal:<br>330 (33%)                                                             | Media:<br>330 (33%)    | Retail:<br>340 (34%)          | Total:<br>1,000 (100%) |
| <b>B. Manually Labeled Tweets Used to Train Sentiment Classification (N=3,000)</b> |                        |                               |                        |
| <b><i>Personal communication tweets only:</i></b>                                  |                        |                               |                        |
| Positive:<br>1,139 (45%)                                                           | Negative:<br>794 (31%) | Neutral/Unknown:<br>606 (24%) | Total:<br>2,539 (100%) |
| <b><i>Media related tweets only:</i></b>                                           |                        |                               |                        |
| Positive:<br>139(32%)                                                              | Negative:<br>127 (29%) | Neutral/Unknown:<br>174 (39%) | Total:<br>440 (100%)   |
| <b><i>Retail related tweets only:</i></b>                                          |                        |                               |                        |
| Positive:<br>14 (67%)                                                              | Negative:<br>0         | Neutral/Unknown:<br>7 (33%)   | Total:<br>21 (100%)    |
| <b><i>All tweets:</i></b>                                                          |                        |                               |                        |
| Positive:<br>1,292 (43%)                                                           | Negative:<br>921 (31%) | Neutral/Unknown:<br>787 (26%) | Total:<br>3,000 (100%) |
