# Supplementary material for: “When ‘Bad’ is ‘Good’”: Identifying Personal Communication and Sentiment in Drug-Related Tweets
Source: PubMed Central journal article supplement (PMC5099500; doi:10.2196/publichealth.6327), 2016-10-24
Supplement: publichealth_v2i2e162_app5.pdf [file publichealth_v2i2e162_app5.pdf]

| <b>Tweet Type /source</b>    | <b>Examples of Common Words Appearing in Expanded URLs</b>                                                          |
|------------------------------|---------------------------------------------------------------------------------------------------------------------|
| Personal communication       | Twitter, Instagram<br>(Personal communication tweets include links to Twitter or other social media status updates) |
| Media-related communication  | news, media, forbes, hightimes, latimes, nytimes, Fox10                                                             |
| Retail-related communication | RefillMyMeds, MMJEdibles, ColoradoMMJ                                                                               |
