# Supplementary material for: “When ‘Bad’ is ‘Good’”: Identifying Personal Communication and Sentiment in Drug-Related Tweets
Source: PubMed Central journal article supplement (PMC5099500; doi:10.2196/publichealth.6327), 2016-10-24
Supplement: publichealth_v2i2e162_app6.pdf [file publichealth_v2i2e162_app6.pdf]

| Category       | Unigram and Bigram Features                                                                                                             |
|----------------|-----------------------------------------------------------------------------------------------------------------------------------------|
| Personal       | keif, when, my, trapgrampa, kick, me, time, smoke, shop, night                                                                          |
|                | when the, kick in, brownie time, rt trapgrampa, trapgrampa pot, pot brownie, edibles kick, me like, freshair in, got me                 |
| Media-related  | raid, santa, police, ana, video, shop, eat, shows, cops, officers                                                                       |
|                | santa ana, pot shop, ana police, shop raid, eating edibles, medical marijuana, high times, shows officers, officers eating, video shows |
| Retail-related | our, today, all, we, Monday, free, concentrates, chocolate, sale, delivery                                                              |
|                | off all, edibles today, we have, on all, our edibles, members save, save on, pot shop, today like, munchie monday                       |
