# Supplementary material for: “When ‘Bad’ is ‘Good’”: Identifying Personal Communication and Sentiment in Drug-Related Tweets
Source: PubMed Central journal article supplement (PMC5099500; doi:10.2196/publichealth.6327), 2016-10-24
Supplement: publichealth_v2i2e162_app7.pdf [file publichealth_v2i2e162_app7.pdf]

| Category | Unigram and Bigram Features                                                                                                  |
|----------|------------------------------------------------------------------------------------------------------------------------------|
| Positive | want, love, need, nice, roll, light, food, bed, good, happy                                                                  |
|          | just want, want blunt, smoke blunt, you smoke, need blunt, want to, love dabs, all want, want edibles, dabs nice             |
| Neutral  | smoke, calli, fuckjcampos, snoop, brownie, kick, dogg, question, robertkazinsky, thatgyaltoni                                |
|          | calli edibles, fuckjcampos when, kick in, edibles hit, edibles kick, snoop dogg, when your, pot brownie, what about, the pot |
| Negative | don't, shit, fake, why, if, fuck, niggas, stop, fucking, dangerous                                                           |
|          | don't smoke, that shit, if you, fake weed, still smoke, would you, why would, stop smoking, never smoke, hate edibles        |
